# Supplementary material for: Prenatal Exposure to Phthalate Esters and Behavioral Syndromes in Children at 8 Years of Age: Taiwan Maternal and Infant Cohort Study
Source: PubMed Central journal article supplement (PMC4286269; doi:10.1289/ehp.1307154), 2014-10-03
Supplement: ehp.1307154.s001.508.pdf [file ehp.1307154.s001.508.pdf]

**Supplemental Material**

**Prenatal Exposure to Phthalate Esters and Behavioral Syndromes in  
Children at Eight Years of Age: Taiwan Maternal and Infant  
Cohort Study**

Yin-Ju Lien, Hsiu-Ying Ku, Pen-Hua Su, Suh-Jen Chen, Hsiao-Yen Chen, Pao-Chi Liao, Wei-J.  
Chen, and Shu-Li Wang

**Table S1.** Regression coefficients (with 95% confidence intervals) of Children Behavior Checklist (CBCL) scores on log<sub>10</sub>-transformed creatinine-corrected maternal urinary concentrations in 8-year-old children by gender (n=122).

| Behavior/metabolite       | Mean ± SD <sup>b</sup> | MMP                    | MEP                  | MBP                  | MBzP                 | MEOHP               | MEHHP               | MEHP                |
|---------------------------|------------------------|------------------------|----------------------|----------------------|----------------------|---------------------|---------------------|---------------------|
| Boys (n=59) <sup>a</sup>  |                        |                        |                      |                      |                      |                     |                     |                     |
| Withdrawn                 | 44.7 ± 6.8             | -1.92 (-5.68, 1.83)    | -2.02 (-6.58, 2.55)  | -1.61 (-6.37, 3.14)  | -3.37 (-8.47, 1.72)  | -0.20 (-2.78, 2.38) | -1.29 (-3.60, 1.01) | -0.45 (-4.91, 4.02) |
| Somatic complains         | 47.6 ± 7.9             | -2.06 (-6.41, 2.30)    | 1.11 (-4.22, 6.43)   | 3.06 (-2.41, 8.53)   | 0.59 (-5.41, 6.59)   | 2.21 (-0.72, 5.14)  | 0.67 (-2.04, 3.37)  | 3.31 (-1.79, 8.40)  |
| Anxious/depressed         | 48.9 ± 7.8             | -2.90 (-7.33, 1.53)    | 0.38 (-5.09, 5.84)   | -0.64 (-6.30, 5.03)  | -3.26 (-9.35, 2.82)  | 1.40 (-1.64, 4.44)  | 0.53 (-2.24, 3.30)  | -0.63 (-5.93, 4.67) |
| Social problems           | 51.4 ± 9.8             | -2.19 (-7.55, 3.18)    | -1.31 (-7.86, 5.23)  | 2.73 (-4.03, 9.48)   | -0.30 (-7.68, 7.08)  | 3.89 (0.38, 7.41)*  | 2.33 (-0.93, 5.60)  | 3.82 (-2.46, 10.09) |
| Thought problems          | 48.4 ± 12              | -3.42 (-10.47, 3.62)   | 7.47 (-0.91, 15.85)  | 0.31 (-8.64, 9.27)   | -0.89 (-10.60, 8.83) | 0.82 (-4.02, 5.66)  | 0.26 (-4.12, 4.65)  | 4.30 (-4.00, 12.59) |
| Attention problems        | 49.4 ± 9.3*            | -3.47 (-8.65, 1.71)    | 1.06 (-5.33, 7.45)   | -4.04 (-10.58, 2.50) | -3.20 (-10.34, 3.95) | 1.29 (-2.28, 4.86)  | -0.79 (-4.03, 2.45) | 1.23 (-4.97, 7.43)  |
| Delinquent behavior       | 50.8 ± 8.9             | -3.31 (-8.20, 1.59)    | 0.35 (-5.69, 6.40)   | 1.53 (-4.72, 7.79)   | -2.28 (-9.05, 4.50)  | 5.04 (1.96, 8.13)*  | 2.74 (-0.24, 5.71)  | 4.66 (-1.06, 10.39) |
| Aggressive behavior       | 52.5 ± 10.5*           | -5.55 (-11.07, -0.04)* | -2.28 (-9.20, 4.63)  | -3.97 (-11.10, 3.15) | -4.68 (-12.40, 3.03) | 2.85 (-0.97, 6.67)  | 0.12 (-3.41, 3.65)  | 0.46 (-6.28, 7.21)  |
| Internalizing problems    | 46.9 ± 7.6             | -2.79 (-6.83, 1.25)    | -0.16 (-5.16, 4.84)  | 0.06 (-5.12, 5.25)   | -2.66 (-8.23, 2.92)  | 1.33 (-1.45, 4.11)  | 0.03 (-2.51, 2.57)  | 0.55 (-4.30, 5.39)  |
| Externalizing problems    | 52.2 ± 10.2*           | -5.22 (-10.62, 0.18)   | -1.61 (-8.38, 5.16)  | -2.51 (-9.51, 4.50)  | -4.24 (-11.79, 3.31) | 3.73 (0.07, 7.39)*  | 0.95 (-2.49, 4.39)  | 1.81 (-4.75, 8.38)  |
| Girls (n=63) <sup>a</sup> |                        |                        |                      |                      |                      |                     |                     |                     |
| Withdrawn                 | 45.9 ± 7.0             | 0.36 (-3.73, 4.45)     | -2.63 (-7.20, 1.94)  | 4.74 (1.02, 8.46)*   | -0.34 (-6.47, 5.79)  | 0.88 (-2.06, 3.82)  | 0.35 (-1.95, 2.65)  | 3.76 (-0.76, 8.27)  |
| Somatic complains         | 48.0 ± 8.6             | -1.22 (-6.59, 4.16)    | -2.56 (-8.61, 3.48)  | -0.42 (-5.58, 4.75)  | -4.68 (-12.65, 3.30) | 0.77 (-3.11, 4.65)  | 0.63 (-2.39, 3.65)  | -0.26 (-6.34, 5.83) |
| Anxious/depressed         | 50.0 ± 9.5             | -0.18 (-5.61, 5.25)    | -2.43 (-8.53, 3.67)  | 2.95 (-2.20, 8.11)   | -2.37 (-10.49, 5.75) | 0.35 (-3.57, 4.27)  | 0.98 (-2.06, 4.02)  | 2.32 (-3.78, 8.43)  |
| Social problems           | 51.1 ± 9.3             | 1.22 (-4.40, 6.83)     | -4.93 (-11.14, 1.29) | 3.37 (-1.95, 8.69)   | -0.69 (-9.11, 7.72)  | 2.04 (-1.98, 6.06)  | 1.63 (-1.49, 4.76)  | -0.01 (-6.35, 6.34) |
| Thought problems          | 46.9 ± 7.0             | -3.43 (-7.55, 0.68)    | -3.32 (-8.00, 1.36)  | -0.43 (-4.48, 3.61)  | -2.11 (-8.40, 4.18)  | -2.18 (-5.17, 0.80) | -1.60 (-3.93, 0.74) | 3.03 (-1.66, 7.72)  |
| Attention problems        | 46.3 ± 7.7             | 0.75 (-3.33, 4.83)     | -4.84 (-9.27, -0.40) | 2.88 (-0.96, 6.73)   | -4.15 (-10.18, 1.87) | 0.29 (-2.66, 3.24)  | -0.51 (-2.80, 1.79) | 0.82 (-3.79, 5.43)  |
| Delinquent behavior       | 48.3 ± 7.6             | 1.55 (-2.76, 5.87)     | 1.03 (-3.86, 5.92)   | 4.25 (0.24, 8.26)*   | 2.49 (-3.97, 8.95)   | 2.80 (-0.24, 5.84)  | 1.27 (-1.14, 3.68)  | 2.61 (-2.24, 7.46)  |
| Aggressive behavior       | 48.9 ± 9.0             | 4.06 (-1.05, 9.16)     | -0.32 (-6.21, 5.57)  | 8.36 (3.87, 12.86)** | 1.60 (-6.21, 9.40)   | 3.73 (0.10, 7.36)*  | 1.74 (-1.16, 4.63)  | 6.72 (1.10, 12.34)* |
| Internalizing problems    | 48.0 ± 8.4             | -0.35 (-5.40, 4.71)    | -2.95 (-8.60, 2.70)  | 3.03 (-1.76, 7.81)   | -2.78 (-10.32, 4.75) | 0.72 (-2.92, 4.36)  | 0.82 (-2.01, 3.65)  | 2.41 (-3.26, 8.08)  |
| Externalizing problems    | 48.7 ± 8.3             | 3.54 (-1.19, 8.27)     | 0.08 (-5.36, 5.53)   | 7.63 (3.46, 11.80)** | 1.99 (-5.22, 9.19)   | 3.68 (0.35, 7.02)*  | 1.71 (-0.96, 4.38)  | 5.88 (0.66, 11.09)* |

<sup>a</sup>Adjusted for children's IQ and family income. <sup>b</sup>Independent t test was used to assess the difference in CBCL score by child gender.

DEHP metabolites: MEHP, MEHHP, MEOHP. \**P*<0.05, \*\**P*<0.01.

**Table S2.** *P*-values for phthalate metabolite level on the behavior scores in boys.<sup>a</sup>

| <b>Behavior/metabolite</b> | <b>MMP</b> | <b>MEP</b> | <b>MBP</b> | <b>MBzP</b> | <b>MEOHP</b> | <b>MEHHP</b> | <b>MEHP</b> |
|----------------------------|------------|------------|------------|-------------|--------------|--------------|-------------|
| Withdrawn                  | 0.30       | 0.38       | 0.44       | 0.19        | 0.77         | 0.25         | 0.96        |
| Somatic complains          | 0.46       | 0.97       | 0.38       | 0.78        | 0.25         | 0.66         | 0.18        |
| Anxious/depressed          | 0.32       | 0.93       | 0.99       | 0.43        | 0.96         | 0.65         | 0.65        |
| Social problems            | 0.47       | 0.57       | 0.43       | 0.99        | 0.40         | 0.16         | 0.22        |
| Thought problems           | 0.24       | <0.05      | 0.96       | 0.87        | 0.66         | 0.87         | 0.18        |
| Attention problems         | 0.20       | 0.84       | 0.37       | 0.42        | 0.51         | 0.67         | 0.57        |
| Delinquent behavior        | 0.19       | 0.96       | 0.08       | 0.54        | 0.10         | 0.50         | 0.80        |
| Aggressive behavior        | 0.06       | 0.52       | 0.34       | 0.26        | 0.17         | 0.84         | 0.76        |
| Internalizing problems     | 0.27       | 0.82       | 0.9        | 0.46        | 0.43         | 0.95         | 0.80        |
| Externalizing problems     | 0.06       | 0.60       | <0.05      | 0.28        | 0.50         | 0.48         | 0.46        |

<sup>a</sup>Wald test was used to examine the significance level of the cross-product term in a model and,  $Y = \alpha + \beta_1 \text{sex} + \beta_2 \log_{10}(\text{creatinine-corrected phthalates}) + \beta_3 \text{sex} \times \log_{10}(\text{creatinine-corrected phthalates})$ . We used male gender=1 as compared to 0 for female gender.

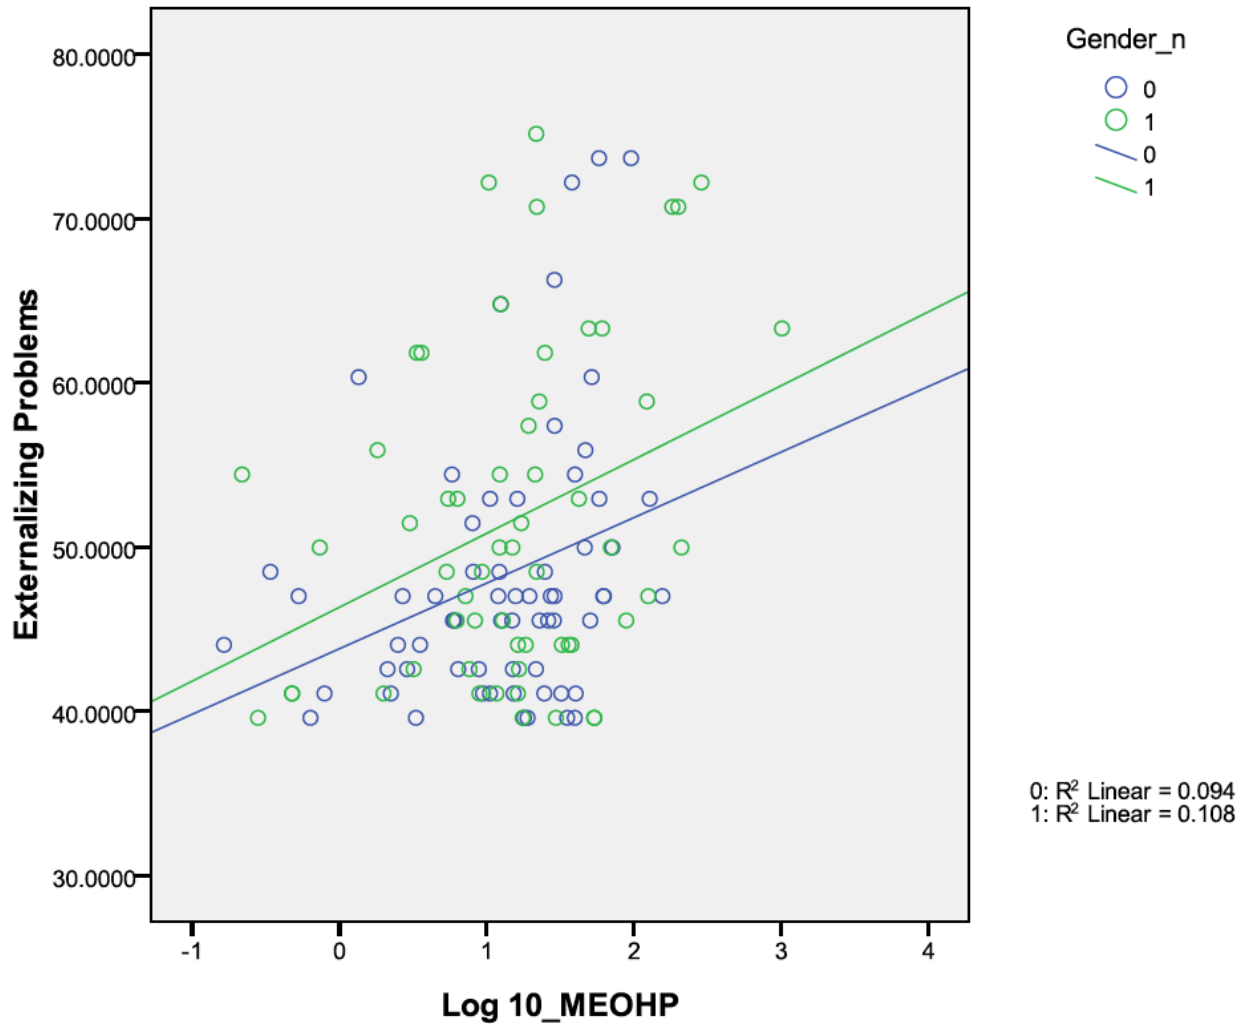

**Figure S1.** Plot of  $\log_{10}$ -transformed maternal creatinine-corrected MEOHP levels corresponding to externalizing problem scores for boys (green 1) and girls (black 0).
